# Supplementary material
Source: Springer Nature journal article supplement (https://www.springermedizin.de/resource/supplementary/12936_2009_1167_MOESM1_ESM.pdf/9550036)

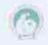

UNITE DE VACCINATION

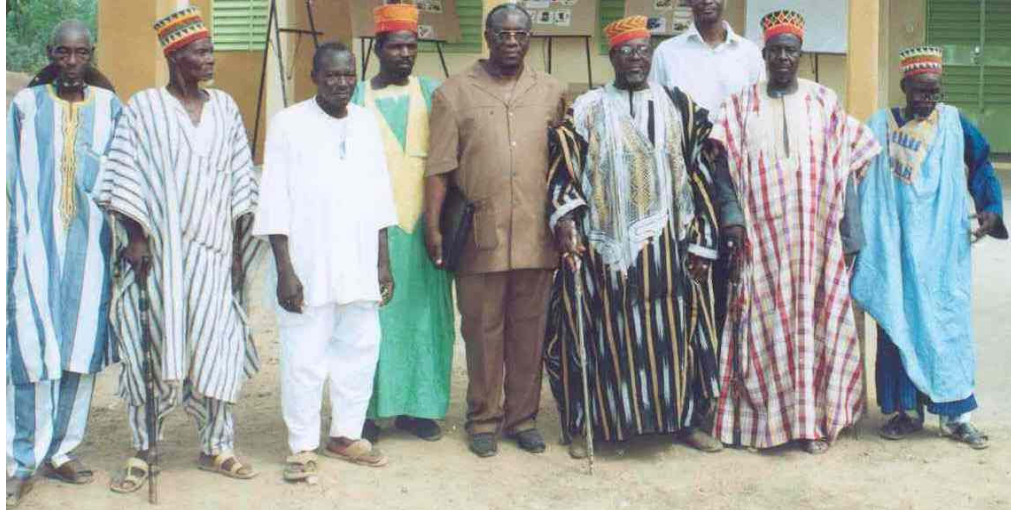

Supplement: MOESM1 [file 9550036]
